# Supplementary material for: The phase separation underlying the pyrenoid-based microalgal Rubisco supercharger
Source: PubMed Central journal article supplement (PMC6265248; doi:10.1038/s41467-018-07624-w), 2018-11-29
Supplement: 41467_2018_7624_MOESM1_ESM.pdf [file 41467_2018_7624_MOESM1_ESM.pdf]

**SUPPLEMENTARY INFORMATION**

**The phase separation underlying the pyrenoid-based microalgal Rubisco supercharger**

Tobias Wunder, Steven Cheng Le Hung, Lai Soak Kuan, Li Hoi Yeung and Oliver Mueller-Cajar\*

School of Biological Sciences, Nanyang Technological University, 60 Nanyang Drive,  
Singapore 637551. Singapore

\*Correspondence should be addressed to O. M.-C. email: [cajar@ntu.edu.sg](mailto:cajar@ntu.edu.sg)

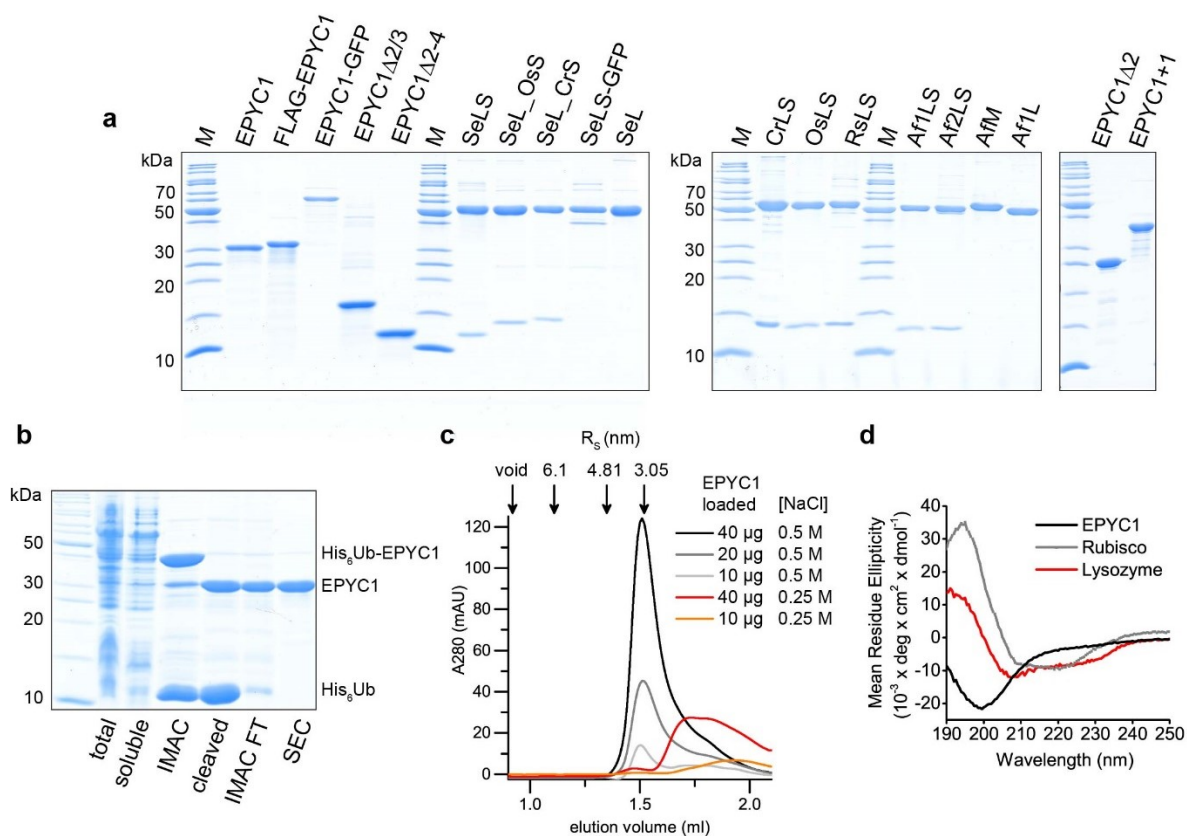

**Supplementary Figure 1 | SDS-PAGE analysis of proteins used in this study and the purification and properties of EPYC1.**

**a**, SDS-PAGE analysis of pure proteins. Rubisco abbreviations: Se, *Synechococcus* PCC6301; Os, rice; Cr, *Chlamydomonas*; Rs, *Rhodobacter sphaeroides*; Af, *Acidithiobacillus ferrooxidans*; L, large subunit; S, small subunit; M, Form II large subunit. **b**, A representative purification of EPYC1. IMAC, eluted fraction after immobilized metal affinity chromatography; cleaved, IMAC fraction following cleavage of His<sub>6</sub>-Ub moiety; IMAC FT, flowthrough of reapplication to IMAC (resulting in His<sub>6</sub>-Ub removal); SEC, size exclusion chromatography. **c**, Analytical gel filtration was performed using a Superdex 200 Increase 10/300 column in buffer A. The R<sub>s</sub> was obtained by comparison with known standards. At reduced [NaCl] the elution was retarded presumably due to interaction with the resin material. **d**, CD spectroscopy of EPYC1 (0.15 mg/ml, 20 mM phosphate buffer pH 8.0) is consistent with a disordered structure (low ellipticity above 210 nm and negative bands near 195 nm). Well folded proteins (CrRubisco and Lysozyme) were measured in parallel as controls.

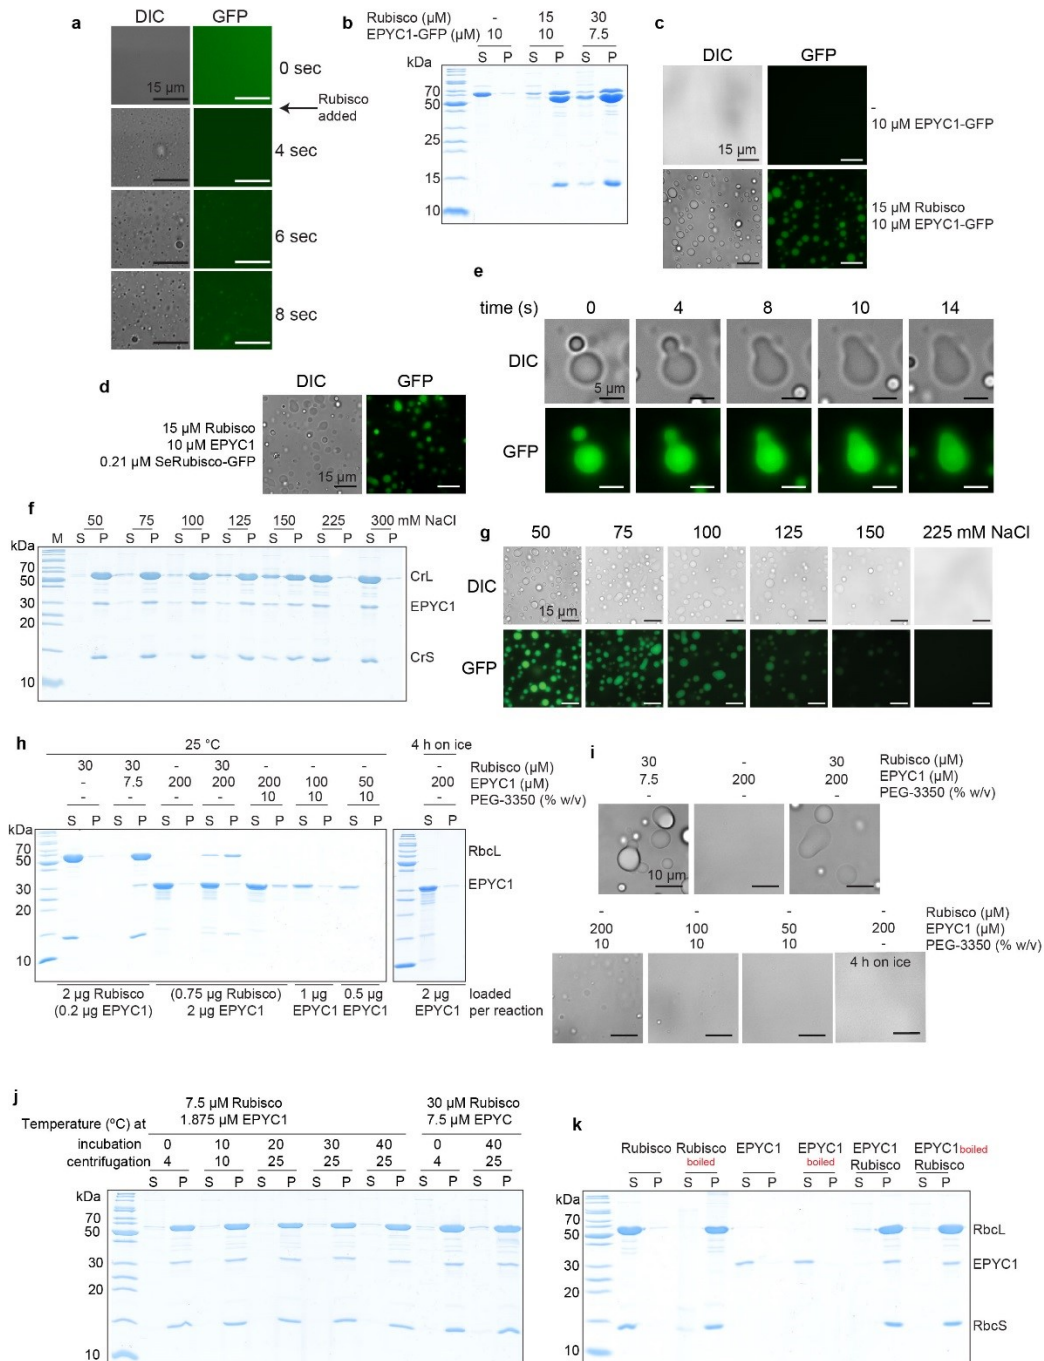

**Supplementary Figure 2| Characterization of the Rubisco-EPYC1 phase separation.** **a**, Time lapse imaging of droplet formation following Rubisco (30  $\mu\text{M}$ ) addition to EPYC1/EPYC1-GFP (7.1/0.4  $\mu\text{M}$ ). Scale bar 15  $\mu\text{m}$ . **b,c** Droplet sedimentation assay (b) and microscopy (c) using EPYC1-GFP. Scale bar 15  $\mu\text{m}$ . **d,e** Droplets can be labelled using cyanobacterial SeRubisco-GFP (scale bar 15  $\mu\text{m}$ ) (d), and exhibit fusion (scale bar 5  $\mu\text{m}$ ) (e). **f**, Representative droplet sedimentation assay used to generate part of the phase diagram shown in Fig. 1e. **g**, The effect of NaCl on droplet formation (30  $\mu\text{M}$  Rubisco, 7.1/0.4  $\mu\text{M}$  EPYC1/EPYC1-GFP). Scale bar 15  $\mu\text{m}$ . **h,i** Phase separation requires both EPYC1 and Rubisco as assessed by droplet sedimentation (h) and microscopy (i). Scale bar 10  $\mu\text{m}$ . **j**, Phase separation is robust up to 40  $^{\circ}\text{C}$ . **k**, EPYC1 (but not Rubisco) maintains solubility and the ability to phase separate with Rubisco after a 15 minute pre-incubation at 98  $^{\circ}\text{C}$ .

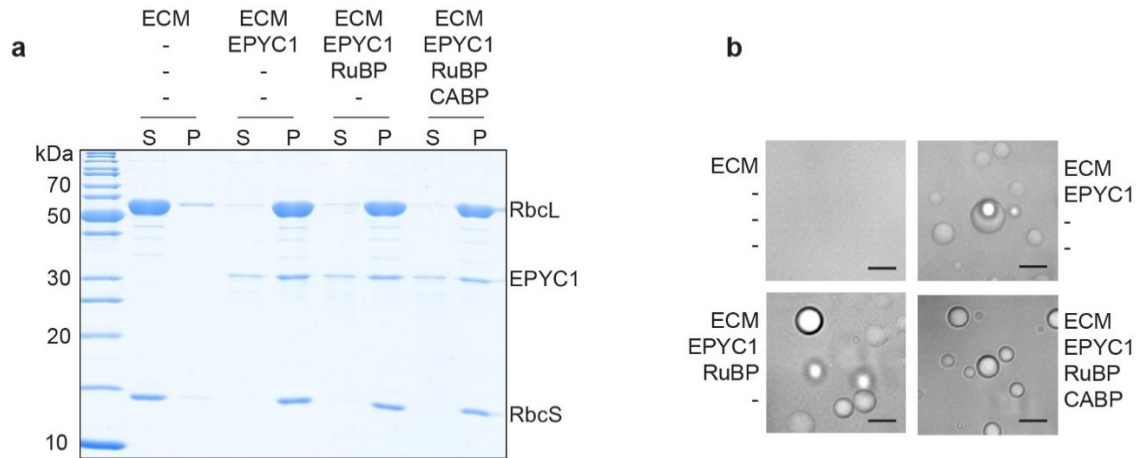

**Supplementary Fig. 3| Quantitative Demixing of Rubisco during Two-Step Rubisco Activity Assay.** Controls to Fig. 2b showing quantitative demixing of Rubisco and droplet formation via sedimentation assay (**a**) and visualization via microscopy (**b**), respectively. Scale bar 5  $\mu\text{m}$ . Concentrations: ECM, 7.5  $\mu\text{M}$  active sites; EPYC1, 3.75  $\mu\text{M}$ ; RuBP, 2.5 mM; CABP, 60  $\mu\text{M}$ .

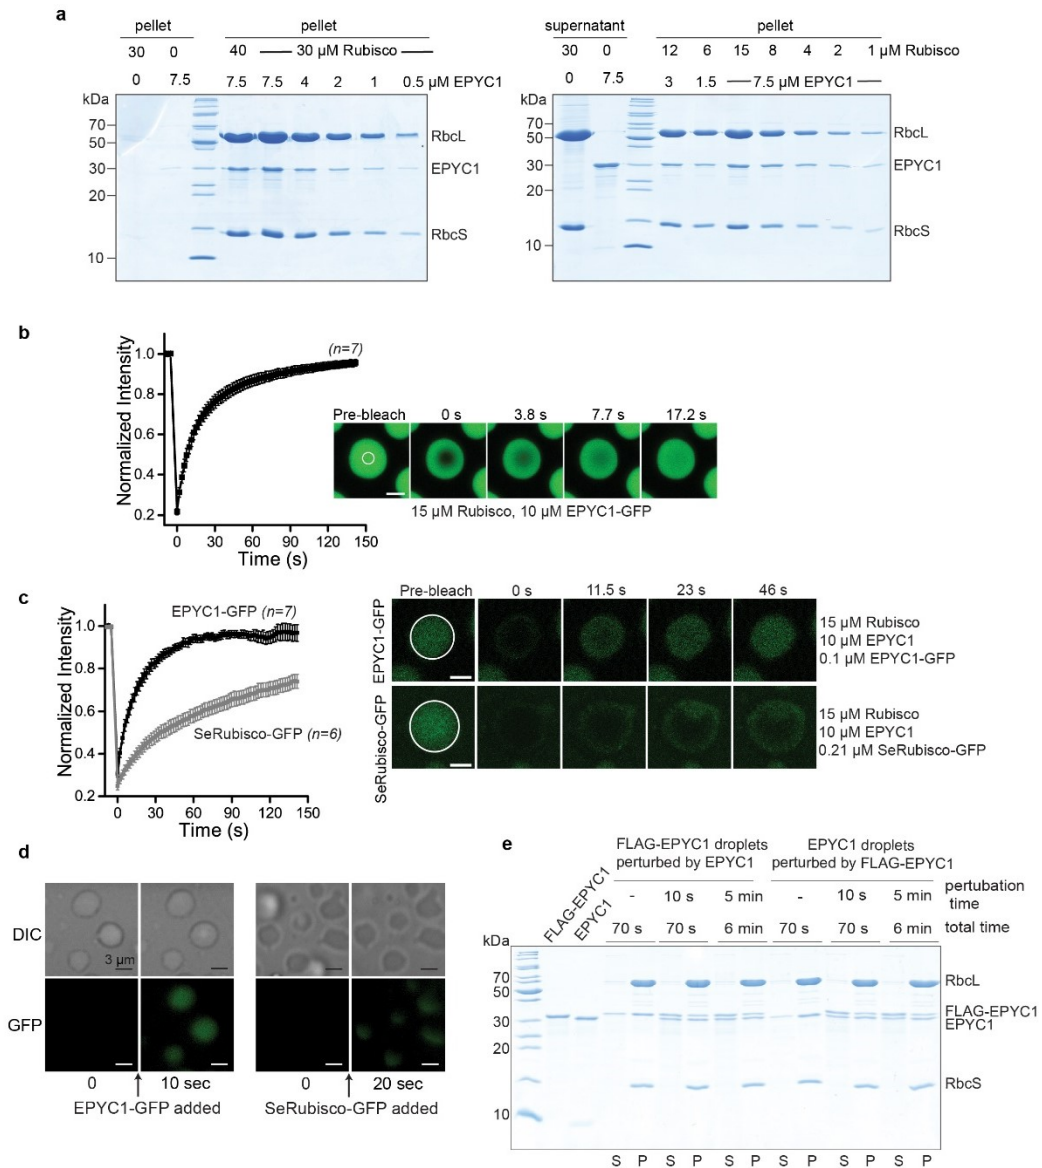

**Supplementary Fig. 4 | Characterization of droplet composition and component exchange. a,** Droplet sedimentation assay performed while varying EPYC1 and Rubisco concentrations. One representative data set used to generate Figs. 3a and b. is shown. **b,** FRAP of droplets formed using Rubisco and EPYC1-GFP. Error bars indicate the s.e.m.. Scale bar 2  $\mu$ m. **c,** Bleaching entire droplets suggests exchange of droplet and bulk solvent components occurs rapidly. Error bars indicate the s.e.m.. Scale bar 2  $\mu$ m. **d,** EPYC1 (25  $\mu$ M)-Rubisco (15  $\mu$ M) droplets were allowed to form for three minutes prior to addition of 0.1  $\mu$ M of EPYC1-GFP (left) or SeRubisco-GFP (right). Scale bar 3  $\mu$ m. **e,** Component exchange assay similar to Fig. 3d, but following the exchange of EPYC1 and FLAG-EPYC1 using the droplet sedimentation assay. Rubisco (7.5  $\mu$ M)-EPYC1 (3.75  $\mu$ M) droplets were formed and perturbed using an equal quantity of FLAG-EPYC1 and incubated for 10 s or 5 minutes. Centrifugation and supernatant removal was performed within 60 s. Exchange was faster than can be resolved within the 70 s required for mixing and sedimentation.

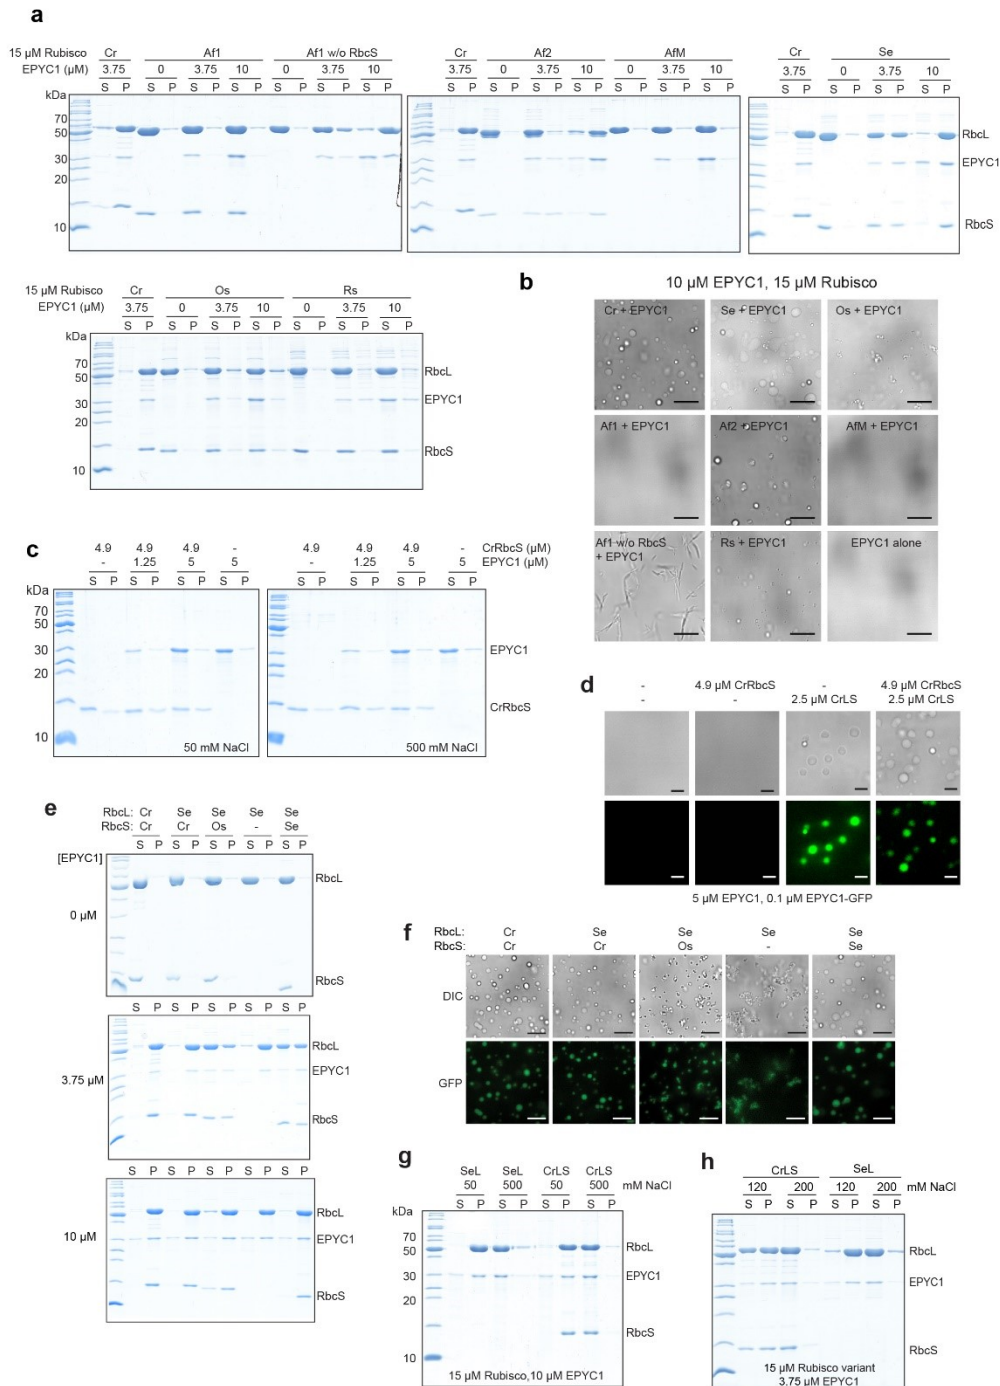

**Supplementary Fig. 5 | Demixing of EPYC1 with heterologous and chimeric Rubiscos. a,b**

Droplet sedimentation assay (a) and microscopy (b) of heterologous Rubiscos demixing with EPYC1.

Data is the extended version of that shown in Figs. 4a and b. Scale bar 15  $\mu$ m. **c,d** Sedimentation assay (c) and microscopy (d) of isolated Chlamydomonas Rubisco Small Subunit (CrRbcS) with EPYC1. Droplet formation necessitates inclusion of the Chlamydomonas holoenzyme (CrLS). Scale bar 5  $\mu$ m.

**e**, Droplet sedimentation assay of cyanobacterial and chimeric Rubiscos as shown abbreviated in Fig. 4c. **f**, Droplet morphology of cyanobacterial and chimeric demixed Rubiscos (extended version of Fig. 4d). Scale bar 15  $\mu$ m.

**g**, The formation of amorphous aggregates with cyanobacterial large subunits (SeL) is reversible by salt. Demixing took place first in buffer A and NaCl concentration was adjusted prior to centrifugation. **h**, SeL-droplets exhibit a similar salt-sensitivity to CrLS-droplets. NaCl concentration adjusted prior to protein addition.

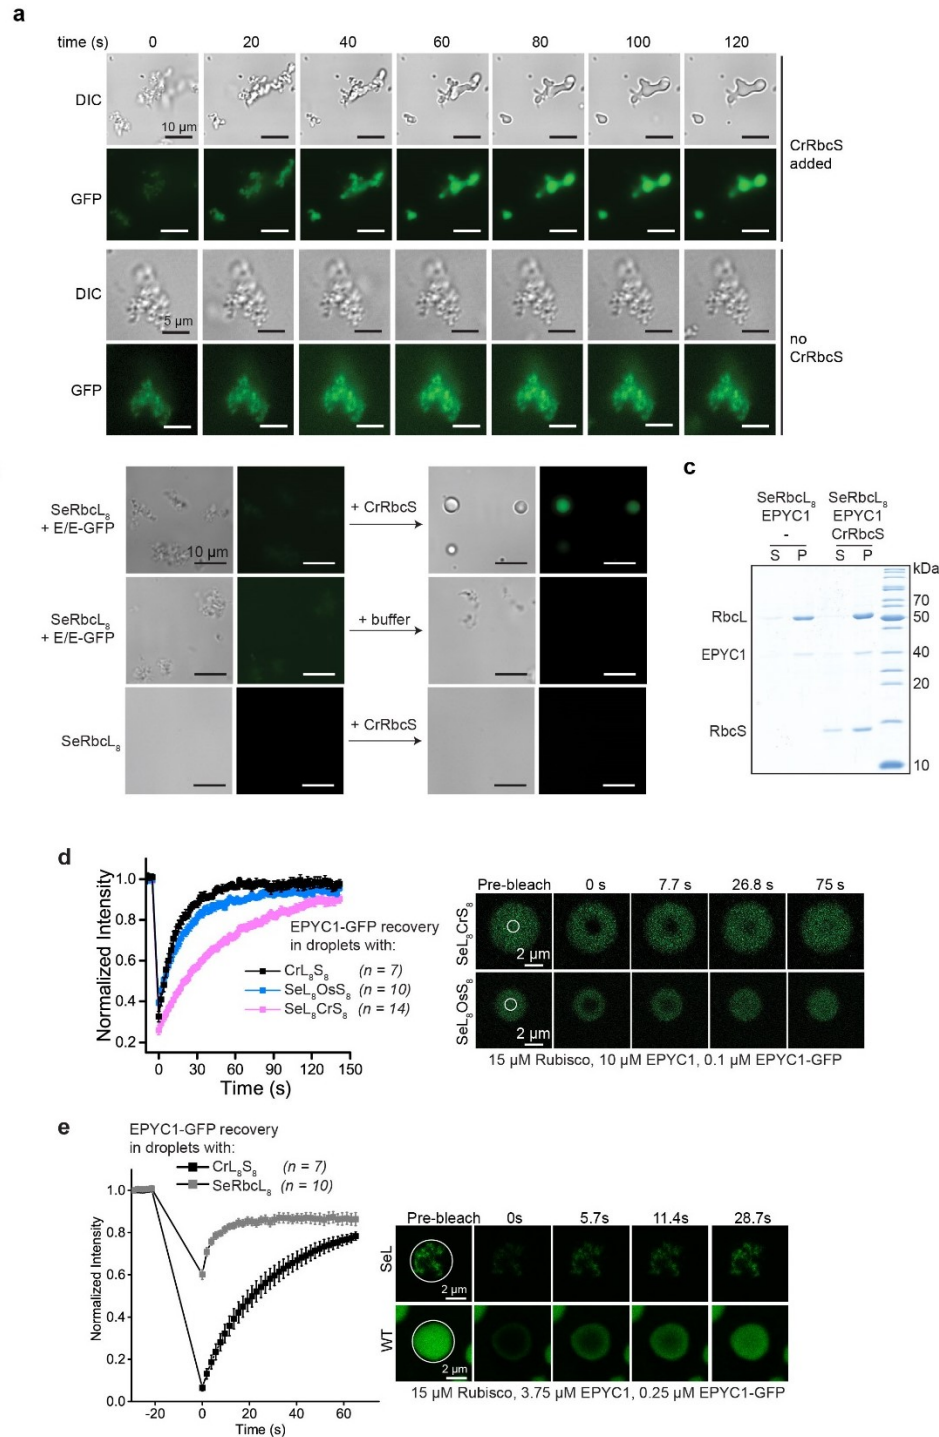

**Supplementary Fig. 6 | Control experiments concerning the transition of droplet morphology and analysis of droplets formed using non-native Rubiscos. a**, Comparison of time lapse of the appearance of SeRbcL<sub>8</sub> (10 μM) -EPYC1/EPYC1-GFP (5/0.4 μM) droplets (2.5 μl) when CrRbcS (4 μM) or buffer A is added (10 μl final). Scale bar 10 μm (upper panel) or 5 μm (lower panel). **b**, Experiments equivalent to those shown in (a), but including the control that lacks EPYC1. Scale bar 10 μm. **c**, SDS-PAGE analysis of a droplet sedimentation assay prior and subsequent to CrRbcS addition confirms that the small subunit enters the droplets. **d**, FRAP assay of droplets formed with EPYC1/EPYC1-GFP using CrRubisco, and the chimeric Rubiscos SeL<sub>8</sub>CrS<sub>8</sub> or SeL<sub>8</sub>OsS<sub>8</sub>. Error bars indicate s.e.m.. Scale bar 2 μm. **e**, FRAP assay of droplets formed with EPYC1/EPYC1-GFP using the Rubisco core SeL<sub>8</sub>. Error bars indicated s.e.m.. Scale bar 2 μm.

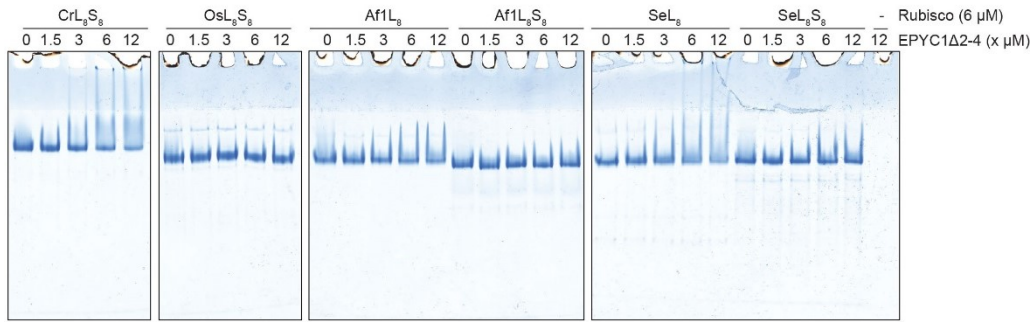

**Supplementary Fig. 7 | Native PAGE gelshift assay using Rubisco and the single repeat variant EPYC1Δ2-4. Full gels are shown for the experiment depicted in Fig. 4f.**



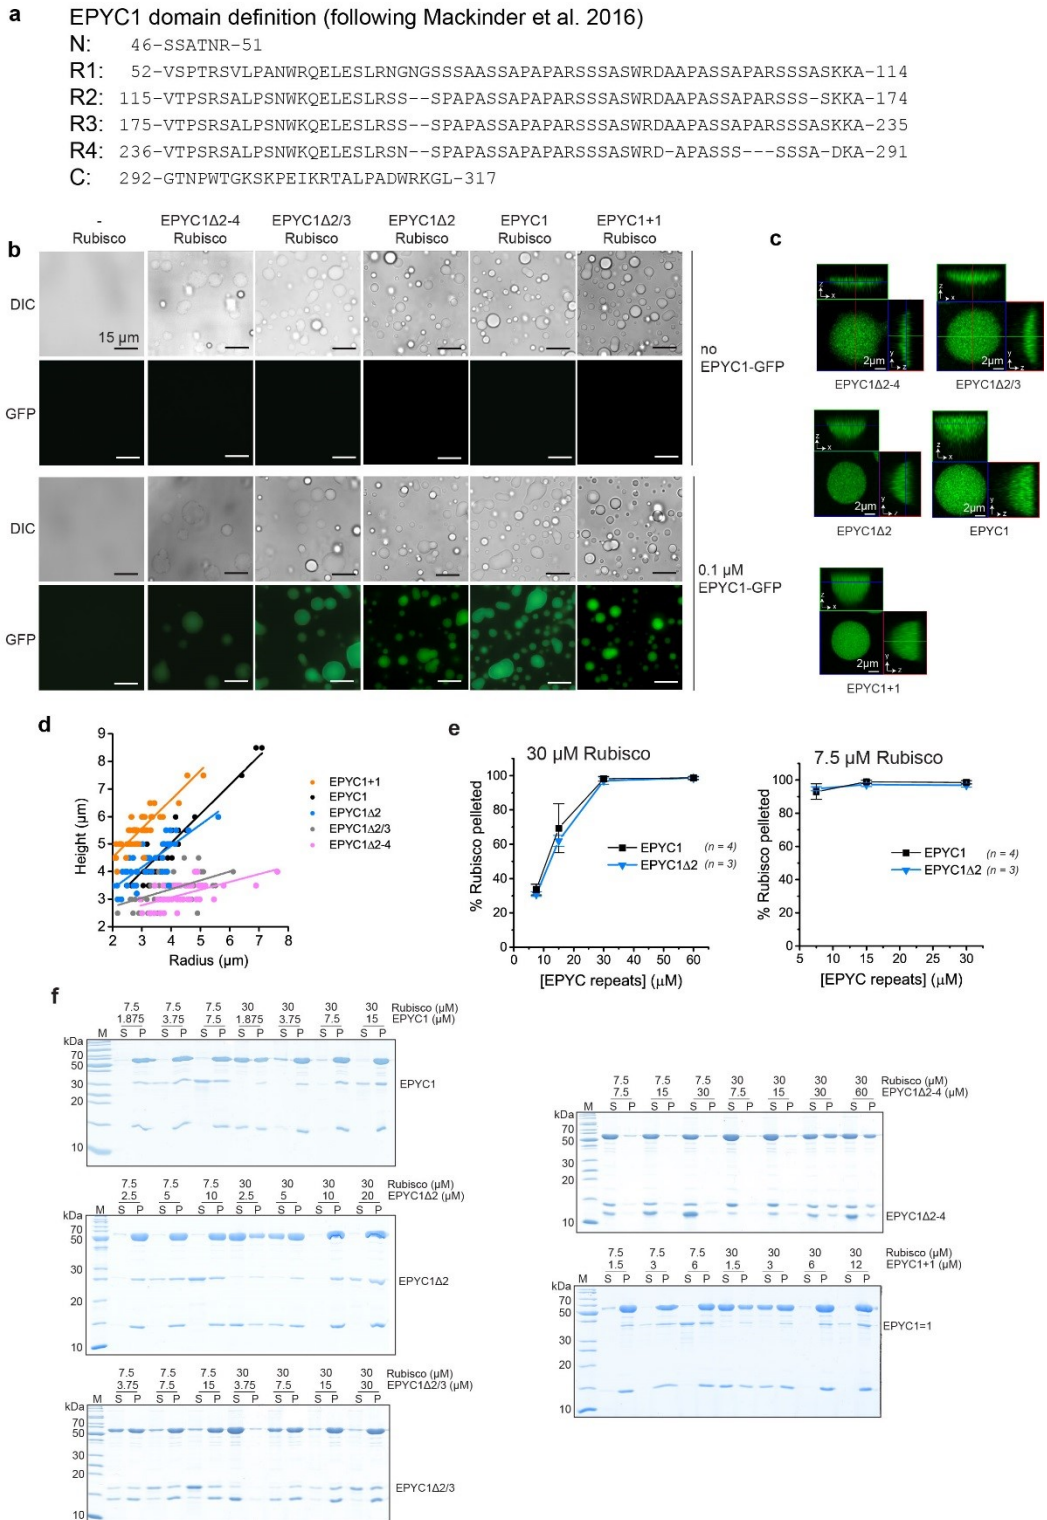

**Supplementary Fig. 8 | Characterization of droplets formed using EPYC1 fragments. a,** Aminoacid sequences for the EPYC1 domains. **b,** Comparison of droplets (7.5 μM EPYC1 or repeat equivalent/ 30 μM Rubisco) formed in the presence and absence of labelling EPYC1-GFP. Scale bar 15 μm. **c,** z-stack analysis of representative droplets to Fig. 5c (conditions as for Fig. 5d). **d,** Distribution of droplet radius and height obtained from z-stack analysis. Scale bar 2 μm. **e,** Additional replicates of droplet sedimentation assay with wild-type EPYC1 and EPYC1Δ2 to address the theory of a ‘magic number effect’, see Fig. 5e. Error bars indicate s.d. **f,** SDS-PAGE analysis of droplet sedimentation assay used to generate Fig. 5e.

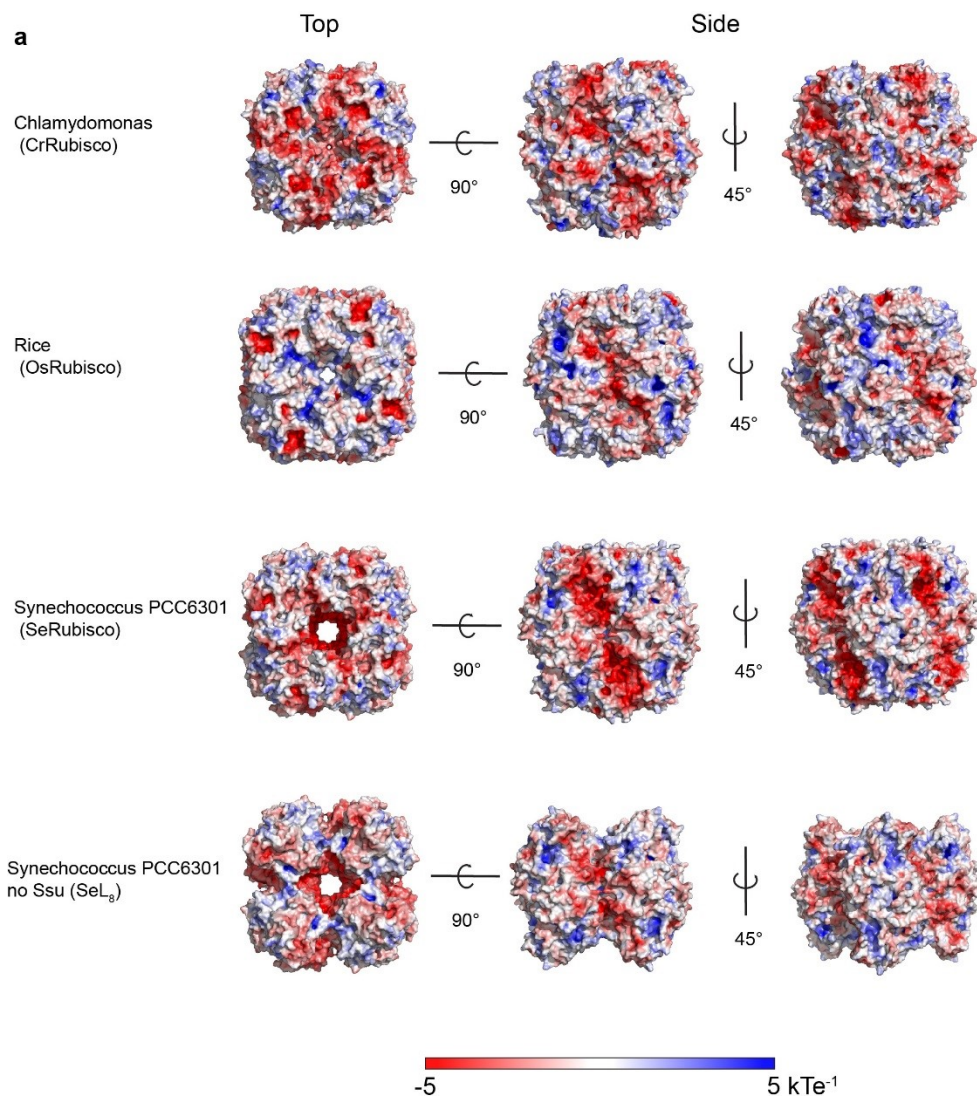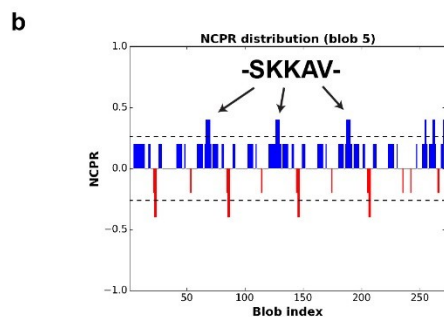

**Supplementary Fig. 9 | Electrostatic properties of Rubisco and EPYC1. a**, Surface charge of available crystal structures was calculated using the APBS plugin<sup>1</sup> in PYMOL ([www.pymol.org](http://www.pymol.org)). The potential on the solvent accessible surface was coloured in the indicated range. CrRubisco, PDB:1GK8; OsRubisco, PDB:1WDD; SeRubisco/SeL<sub>8</sub>, PDB:1RBL. **b**, EPYC1 NPCR (net charge per residue) was calculated for five residue stretches (blobs) using the CIDER webtool<sup>2</sup>. Three positively charged blobs correspond to the SKKAV motif as indicated.

**Supplementary Table 1| Plasmids used in this study**

| <b>Plasmid</b>             | <b>Encoded gene product</b>                                                          | <b>Reference</b>                            |
|----------------------------|--------------------------------------------------------------------------------------|---------------------------------------------|
| pHue <i>CrEPYC1</i>        | His <sub>6</sub> -Ub-CrEPYC1 (UniProt A0A2K3DA85, residues 46-317)                   | This work                                   |
| pHue <i>FLAGCrEPYC1</i>    | His <sub>6</sub> -Ub-FLAG-CrEPYC1                                                    | This work                                   |
| pHue <i>FLAGCrEPYC1GFP</i> | His <sub>6</sub> -Ub-FLAG-CrEPYC1-GFP*                                               | This work                                   |
| pHue <i>CrEPYC1Δ2</i>      | His <sub>6</sub> -Ub-CrEPYC1Δ2*                                                      | This work                                   |
| pHue <i>CrEPYC1Δ2/3</i>    | His <sub>6</sub> -Ub-CrEPYC1Δ2/3*                                                    | This work                                   |
| pHue <i>CrEPYC1Δ2-4</i>    | His <sub>6</sub> -Ub-CrEPYC1Δ2-4*                                                    | This work                                   |
| pHue <i>CrEPYC1+1</i>      | His <sub>6</sub> -Ub-CrEPYC1+1*                                                      | This work                                   |
| pTrc <i>SynLF345IS</i>     | <i>Synechococcus</i> PCC6301 (Se) RbcL (F345I) and RbcS                              | Mueller-Cajar and Whitney 2008 <sup>3</sup> |
| pTrc <i>SynLF345I</i>      | <i>Synechococcus</i> PCC6301 RbcL (F345I)                                            | This work                                   |
| pTrc <i>SynLF345IS-GFP</i> | <i>Synechococcus</i> PCC6301 RbcL (F345I) and RbcS-GFP*                              | This work                                   |
| pET22b <i>CrRbcS</i>       | CrRbcS (UniProt P00873, residues 46-185)                                             | This work                                   |
| pET22b <i>OsRbcS</i>       | <i>Oryza sativa</i> subsp. <i>japonica</i> OsRbcS (UniProt P18566, residues 48-175)  | This work                                   |
| pET30b <i>AfcbbLS</i>      | <i>Acidithiobacillus ferrooxidans</i> AfCbbL and AfCbbS                              | Tsai et al. 2015 <sup>4</sup>               |
| pHue <i>AfcbbL</i>         | His <sub>6</sub> -Ub-AfCbbL<br><i>Acidithiobacillus ferrooxidans</i> AfCbbL          | This work                                   |
| pHue <i>AfcbbM</i>         | <i>A. ferrooxidans</i> AfM                                                           | Tsai et al. 2015                            |
| pET24b <i>Af2cbbLS</i>     | <i>A. ferrooxidans</i> UniProt Af2CbbL (UniProt B7JB30) and Af2CbbS (UniProt B7JB29) | This work                                   |
| pET30b <i>RscbbLS</i>      | <i>Rhodobacter sphaeroides</i> (Rs) RbcL and RbcS                                    | Mueller-Cajar et al. 2011 <sup>5</sup>      |

\* amino acid sequence given in Supplementary Table 2

**Supplementary Table 2| Sequences of selected proteins**

| <b>Protein</b>               | <b>Amino acid sequence</b>                                                                                                                                                                                                                                                                                                                                                                                                                                                                                                                                                                                         |
|------------------------------|--------------------------------------------------------------------------------------------------------------------------------------------------------------------------------------------------------------------------------------------------------------------------------------------------------------------------------------------------------------------------------------------------------------------------------------------------------------------------------------------------------------------------------------------------------------------------------------------------------------------|
| FLAG-CrEPYC1-GFP (EPYC1-GFP) | <i>DYKDDDDKSSATNRVSPTRSVLPANWRQELESRLRNGNGSSSAASSA</i><br>PAPARSSSASWRDAAPASSAPARSSSASKKAVTPSRALPSNWKQEL<br>ESLRSSSPAPASSAPAPARSSSASWRDAAPASSAPARSSSSKKAVTPS<br>RSALPSNWKQELESRLSSSPAPASSAPAPARSSSASWRDAAPASSAP<br>ARSSSASKKAVTPSRALPSNWKQELESRLSNSPAPASSAPAPARSSS<br>ASWRDAPASSSSSSADKAGTNPWTGKSKPEIKRTALPADWRKGL <u>GS</u><br><u>LGSGGR</u> MVSKGEELFTGVVPILVELDGDVNGHKFSVRGEGEGDA<br>TNGKLTCLKFICTTGKLPVPWPTLVTTLYGVQCFSRYPDHMKQHDF<br>FKSAMPEGYVQERTISFKDDGTYKTRAEVKFEGDTLVNRIELKGIDF<br>KEDGNILGHKLEYNFNSHNVYITADKQKNGIKANFKIRHNVEDGSV<br>QLADHYQQNTPIGDGPVLLPDNHYLSTQSKLSKDPNEKRDHMLVLE<br>FVTAAGITLGMDELYK* |
| CrEPYC1Δ2                    | SSATNRVSPTRSVLPANWRQELESRLRNGNGSSSAASSAPAPARSSSA<br>SWRDAAPASSAPARSSSASKKAVTPSRALPSNWKQELESRLSSSPA<br>PASSAPAPARSSSASWRDAAPASSAPARSSSASKKAVTPSRALPSN<br>WKQELESRLSNSPAPASSAPAPARSSSASWRDAPASSSSSSADKAGT<br>NPWTGKSKPEIKRTALPADWRKGL                                                                                                                                                                                                                                                                                                                                                                                |
| CrEPYC1Δ2/3                  | SSATNRVSPTRSVLPANWRQELESRLRNGNGSSSAASSAPAPARSSSA<br>SWRDAAPASSAPARSSSASKKAVTPSRALPSNWKQELESRLSNSPA<br>PASSAPAPARSSSASWRDAPASSSSSSADKAGTNPWTGKSKPEIKRT<br>ALPADWRKGL                                                                                                                                                                                                                                                                                                                                                                                                                                                |
| CrEPYC1Δ2-4                  | SSATNRVSPTRSVLPANWRQELESRLRNGNGSSSAASSAPAPARSSSA<br>SWRDAAPASSAPARSSSASKKAGTNPWTGKSKPEIKRTALPADWRK<br>GL                                                                                                                                                                                                                                                                                                                                                                                                                                                                                                           |
| CrEPYC1+1                    | SSATNRVSPTRSVLPSNWKQELESRLSSSPAPASSAPAPARSSSASWR<br>DAAPASSAPARSSSASKKAVTPSRALPSNWKQELESRLSSSPAPASS<br>APAPARSSSASWRDAAPASSAPARSSSSKKAVTPSRALPSNWKQEL<br>ESLRSSSPAPASSAPAPARSSSASWRDAAPASSAPARSSSSKKAVTPS<br>RSALPSNWKQELESRLSSSPAPASSAPAPARSSSASWRDAAPASSAP<br>ARSSSASKKAVTPSRALPSNWKQELESRLSNSPAPASSAPAPARSSS<br>ASWRDAPASSSSSSADKAGTNPWTGKSKPEIKRTALPADWRKGL                                                                                                                                                                                                                                                    |
| SeRbcS-GFP                   | MSMKTLPKERRFETFSYLPPLSDRQIAAQIEYMIEQGFHPLIEFNEHS<br>NPEEFYWTMWKLPFLDCKSPQQVLDEVRECRSEYGDCYIRVAGFD<br>NIKQCQTVSFIVHRPGRYGSNGDLGGSGGRVSKGEELFTGVVPILVE<br>LDGDVNGHKFSVRGEGEGDATNGKLTCLKFICTTGKLPVPWPTLVTT<br>LYGVQCFSRYPDHMKQHDFFKSAMPEGYVQERTISFKDDGTYKT<br>RAEVKFEGDTLVNRIELKGIDFKEDGNILGHKLEYNFNSHNVYITAD<br>KQKNGIKANFKIRHNVEDGSVQLADHYQQNTPIGDGPVLLPDNHYL<br>STQSKLSKDPNEKRDHMLVLEFVTAAGITLGMDELYK*                                                                                                                                                                                                             |

\*sequence of FLAG-tag in *italics*, linker sequence between protein of interest and GFP-tag underlined

## Supplementary References

- 1 Baker, N. A., Sept, D., Joseph, S., Holst, M. J. & McCammon, J. A. Electrostatics of nanosystems: application to microtubules and the ribosome. *Proc. Natl. Acad. Sci. U. S. A.* **98**, 10037-10041, doi:10.1073/pnas.181342398 (2001).
- 2 Holehouse, A. S., Das, R. K., Ahad, J. N., Richardson, M. O. & Pappu, R. V. CIDER: Resources to Analyze Sequence-Ensemble Relationships of Intrinsically Disordered Proteins. *Biophysical Journal* **112**, 16-21, doi:10.1016/j.bpj.2016.11.3200 (2017).
- 3 Mueller-Cajar, O. & Whitney, S. M. Evolving improved *Synechococcus* Rubisco functional expression in *Escherichia coli*. *Biochem J* **414**, 205-214 (2008).
- 4 Tsai, Y. C., Lapina, M. C., Bhushan, S. & Mueller-Cajar, O. Identification and characterization of multiple rubisco activases in chemoautotrophic bacteria. *Nat Commun* **6**, 8883, doi:10.1038/ncomms9883 (2015).
- 5 Mueller-Cajar, O. *et al.* Structure and function of the AAA+ protein CbbX, a red-type Rubisco activase. *Nature* **479**, 194-199 (2011).
