# Supplementary material for: The phase separation underlying the pyrenoid-based microalgal Rubisco supercharger
Source: PubMed Central journal article supplement (PMC6265248; doi:10.1038/s41467-018-07624-w), 2018-11-29
Supplement: 41467_2018_7624_MOESM3_ESM.pdf [file 41467_2018_7624_MOESM3_ESM.pdf]

## Description of Additional Supplementary Files

File Name: Supplementary Movie 1

Description: The EPYC1-Rubisco phase separation

Droplets were generated using 15  $\mu\text{M}$  Rubisco and 10  $\mu\text{M}$  EPYC1 spiked with 0.1  $\mu\text{M}$  EPYC1-GFP. After 3 min, DIC and epifluorescence images were acquired every 2 s, channels were pseudocolored and merged in ImageJ/Fiji, and exported with 10 frames per second, resulting in a 20x accelerated movie.

File Name: Supplementary Movie 2

Description: Transition of droplet morphology upon small subunit addition

Droplets were generated as described for Fig. 4e. 10 s after addition of CrRbcS, DIC and epifluorescence images were acquired every 2 s, channels were pseudocolored and merged in ImageJ/Fiji, and exported with 10 frames per second, resulting in a 20x accelerated movie.
